# Supplementary material for: Early-Life Stress Modulates Gut Microbiota and Peripheral and Central Inflammation in a Sex-Dependent Manner
Source: PubMed Central journal article supplement (PMC7918891; doi:10.3390/ijms22041899), 2021-02-14
Supplement: ijms-22-01899-s001.pdf [file ijms-22-01899-s001.pdf]

**Table S1.** Primer sequences used for qRT-PCR.

| Gene  |            | 5'→3'                 |
|-------|------------|-----------------------|
| Ido-1 | Sense      | TTAAGACGCAATGAAGACT   |
|       | Anti-sense | GAGGTGGAACATTCTGAG    |
| Ido-2 | Sense      | ACGACGACGATGATGATA    |
|       | Anti-sense | GGCTGAAGGATAGTAAGATAC |
| Tdo-1 | Sense      | TTCCAGAGTCTTCAGTTC    |
|       | Anti-sense | CTCATTGTAGTCTCCTTCA   |
| Zo-1  | Sense      | GCATTATTCGCCTTCATACAA |
|       | Anti-sense | ACACAACAATCGGATACCA   |
| Gapdh | Sense      | AGTGGCAAAGTGGAGATT    |
|       | Anti-sense | GTGGAGTCATACTGGAACA   |
| Ubc   | Sense      | AGAAGGTCAAACAGGAAGATA |
|       | Anti-sense | CCAAGAACAAGCACAAAGAA  |

### Colon

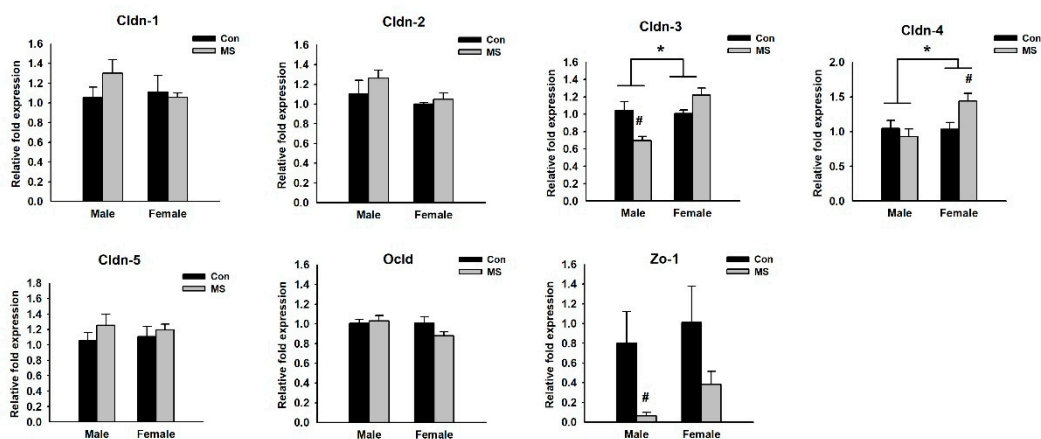

### Hippocampus

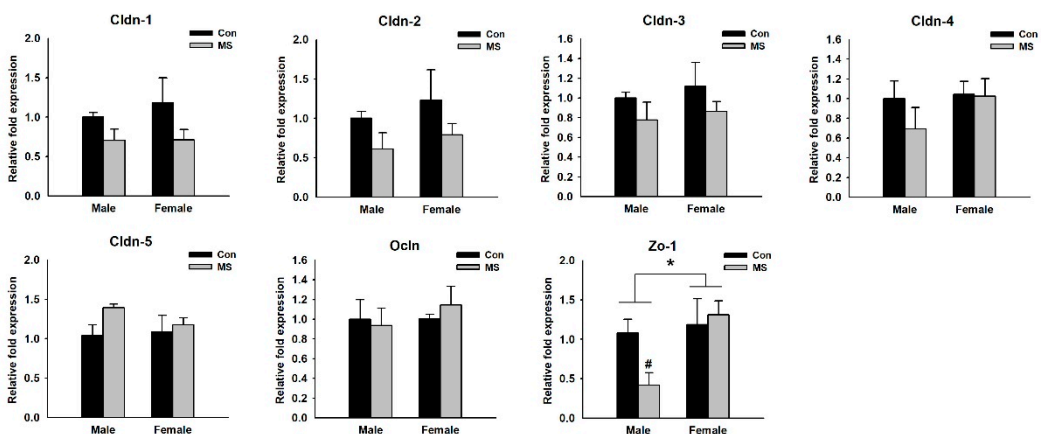

**Figure S1.** The mRNA expression of occludin (Ocln) and claudin (Cldn) 1-5 genes in the colon and hippocampus of maternal separation (MS) rats. The mRNA expression was detected through qRT-PCR using specific primers. Data are expressed as mean  $\pm$  SEM. A two-way ANOVA test, \*  $p < 0.05$  on male vs. female; #  $p < 0.05$  on control vs. MS within each sex.  $n = 10$  per group in the colon,  $n = 6$  per group in the hippocampus.

Cldn1, 5'-AGACCAGACTTCCTTACGA-3'; 5'-TAGAATCAAGCCTCAGAA-TAACA-3'  
 Cldn2, 5'-TTCATCCTTGGTGGTATC-3'; 5'-CAGTGGTGAGTAGAAGTC-3'  
 Cldn3, 5'-CCACACGCACACACATAT-3'; 5'-CCCAACCCTCTTCACCAT-3'  
 Cldn4, 5'-GCCAGCAACTATGTGTAAG-3'; 5'-GCCGTTATGAGTTCAATCC-3'  
 Cldn5, 5'-GCTCAGAACAGACTACAG-3'; 5'-AATCTTAGAGTTCCACCAT-3'  
 Oold, 5'-TTGCTTCATCGCTTCCTT-3'; 5'-TCAAGTAGTATCTTCTCGTTCTG-3'  
 ZO-1, 5'-GCATTATTCGCCTTCATACAA-3'; 5'-ACACAACAATCGGATACCA-3'

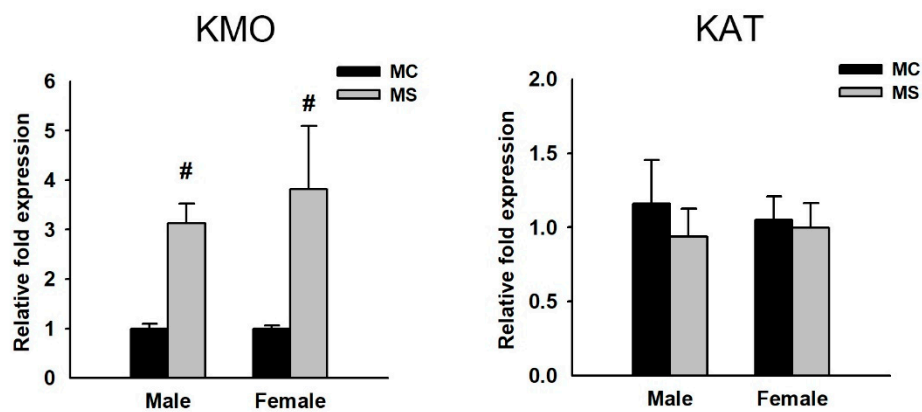

**Figure S2.** The mRNA expression of kynurenine 3-monooxygenase (Kmo) and kynurenine aminotransferase (Kat) in the hippocampus of maternal separation (MS) rats. The mRNA expression was detected through qRT-PCR using specific primers (Kmo, 5'-TTGAAGACTGCTTGGTATT-3' and 5'-GCTCGCATCTCTATGTAAT-3'; Kat, 5'-CTTGATTATAGGATGAGAG-3' and 5'-GAATGATAACAGCAGGAGAT-3'). Data are expressed as mean  $\pm$  SEM. A two-way ANOVA test, \*  $p < 0.05$  on male vs. female; #  $p < 0.05$  on control vs. MS within each sex.  $n = 6$  per group.
